# Supplementary material for: Catalytic performance of mixed MxCo3−xO4 (M = Cr, Fe, Mn, Ni, Cu, Zn) spinels obtained by combustion synthesis for preferential carbon monoxide oxidation (CO-PROX): insights into the factors controlling catalyst selectivity and activity
Source: Royal Society of Chemistry journal article supplement (doi:10.1039/d2cy00388k), 2022-01-01
Supplement: d2cy00388k1.pdf [file d2cy00388k1.pdf]

## Supporting Information

# Catalytic Performance of Mixed $M_xCo_{3-x}O_4$ ( $M = Cr, Fe, Mn, Ni, Cu, Zn$ ) Spinel Obtained by Combustion Synthesis for Preferential Carbon Monoxide Oxidation (CO-PROX) – Insights into the Factors Controlling the Catalysts Selectivity and Activity

*Camillo Hudy<sup>1</sup>, Olga Dlugosz<sup>2</sup>, Joanna Gryboś<sup>1</sup>, Filip Zasada<sup>1</sup>, Aneta Krasowska<sup>1</sup>, Janusz Janas<sup>1</sup>, Zbigniew Sojka<sup>1</sup>*

\*Corresponding Authors: C. Hudy, Z. Sojka

A) **Table S1.** Average crystallite size and strains calculated by Williamson-Hall method along with the BET surface area.

| Sample                  | Williamson-Hall method $d / \text{nm}$ | Strain / $10^{-3}$ | Surface area / $\text{m}^2 \text{g}^{-1}$ |
|-------------------------|----------------------------------------|--------------------|-------------------------------------------|
| Cr-Co                   | 27.4                                   | 19.6               | 15.1                                      |
| Mn-Co                   | 20.5                                   | 12.4               | 16.8                                      |
| Fe-Co                   | 20.8                                   | 7.3                | 15.9                                      |
| $\text{Co}_3\text{O}_4$ | 49.6                                   | 2.7                | 10.0                                      |
| Ni-Co                   | 46.6                                   | 5.4                | 11.7                                      |
| Cu-Co                   | 52.1                                   | 3.8                | 8.9                                       |
| Zn-Co                   | 52.7                                   | 7.4                | 14.9                                      |

B) **Sample imaging by Scanning Electron Microscopy**

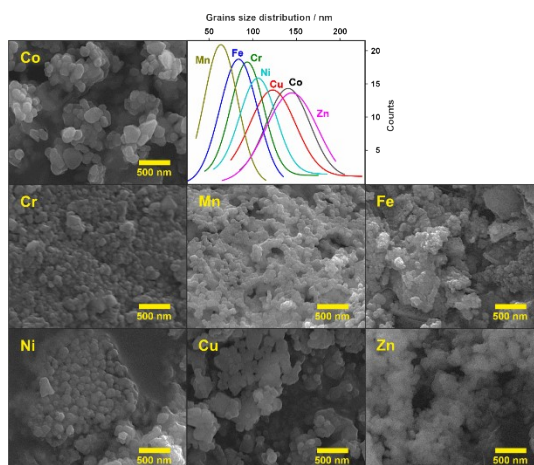

**Figure S1.** The SEM images along with the fitted Gauss curves based on the grains size distribution.

### C) XPS spectra of the catalysts

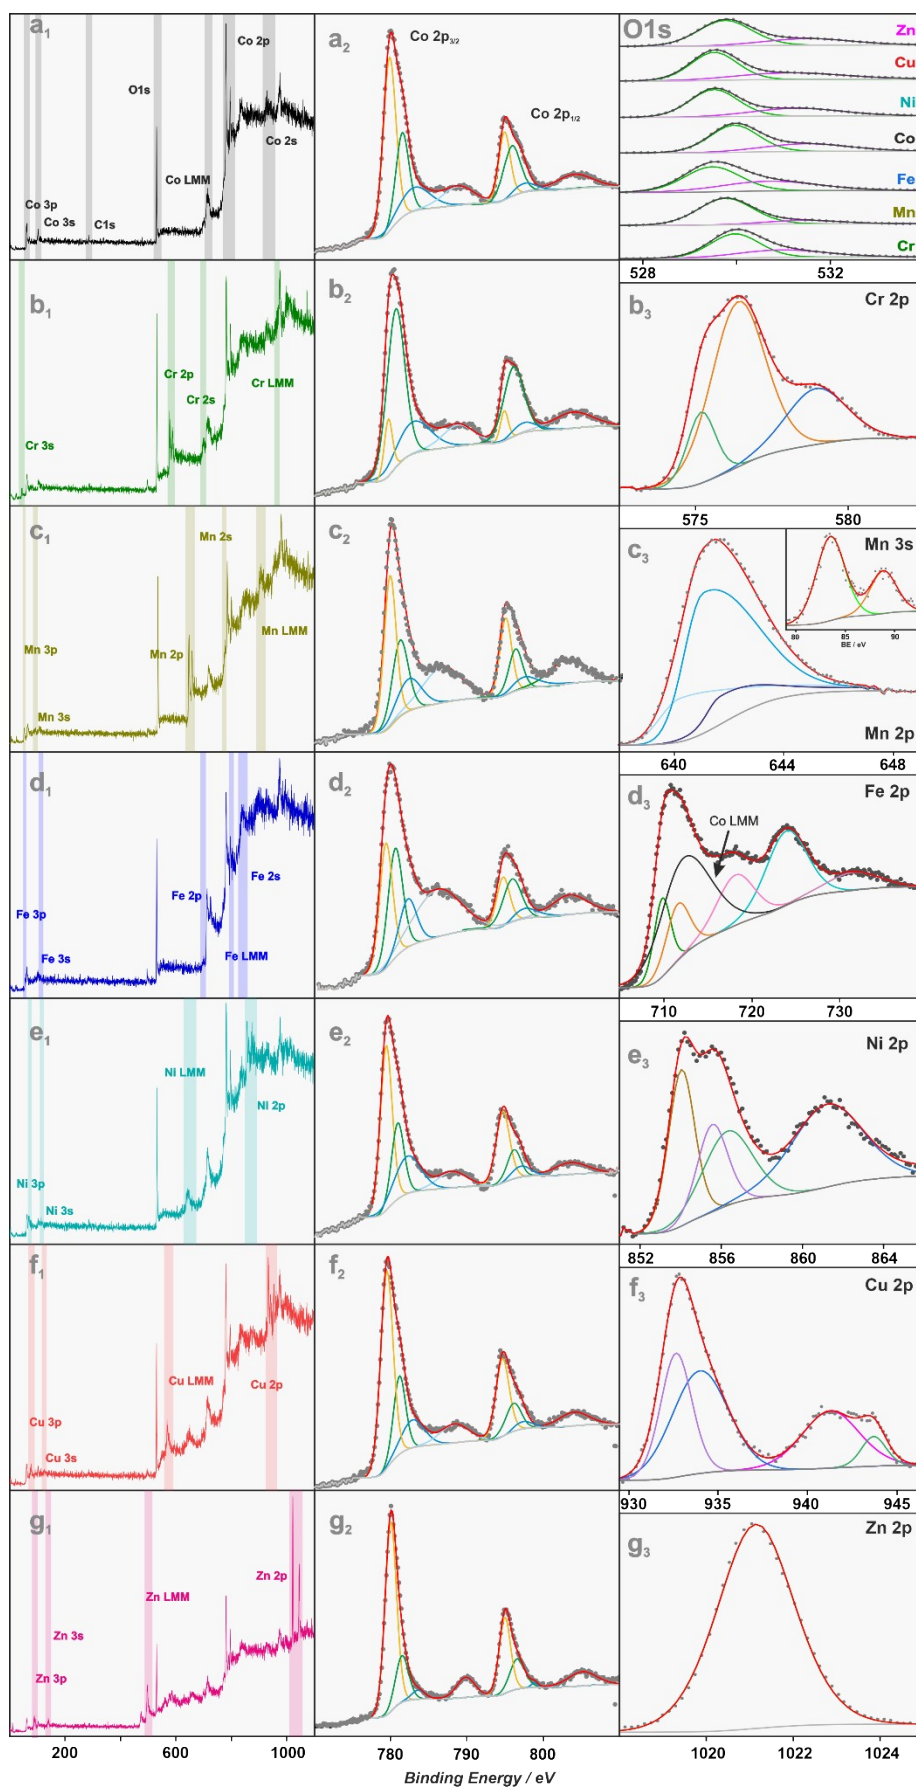

**Figure S2.** The deconvoluted XPS spectra: a<sub>1</sub> – g<sub>1</sub> show full range spectra in following order Co(a). Cr-Co(b). Mn-Co(c). Fe-Co(d). Ni-Co(e). Cu-Co(f). Zn-Cu(g). a<sub>2</sub> – g<sub>2</sub> show Co<sub>2p</sub> range and b<sub>3</sub> – g<sub>3</sub> 2p range of proper heterometal. The right-upper corner shows the spectra of the O1s range of each sample.

**Table S2.** Chemical composition of the samples determined by XRF and XPS techniques along with the calculated formulas along with the calculated  $\text{Co}^{3+}/\text{Co}^{2+}$  ratio.

| Sample | M/Co |      | Chemical Formula                             |                                              |
|--------|------|------|----------------------------------------------|----------------------------------------------|
|        | XRF  | XPS  | bulk                                         | surface                                      |
| Cr-Co  | 0.49 | 0.54 | $\text{Cr}_{0.98}\text{Co}_{2.02}\text{O}_4$ | $\text{Cr}_{1.08}\text{Co}_{1.98}\text{O}_4$ |
| Mn-Co  | 0.51 | 0.65 | $\text{Mn}_{1.02}\text{Co}_{1.98}\text{O}_4$ | $\text{Mn}_{1.3}\text{Co}_{1.7}\text{O}_4$   |
| Fe-Co  | 0.42 | 0.67 | $\text{Fe}_{0.84}\text{Co}_{2.16}\text{O}_4$ | $\text{Fe}_{1.34}\text{Co}_{1.66}\text{O}_4$ |
| Co     | -    | -    | $\text{Co}_3\text{O}_4$                      |                                              |
| Ni-Co  | 0.65 | 0.84 | $\text{Ni}_{1.3}\text{Co}_{1.7}\text{O}_4$   | $\text{Ni}_{1.68}\text{Co}_{1.32}\text{O}_4$ |
| Cu-Co  | 0.46 | 0.48 | $\text{Cu}_{0.92}\text{Co}_{2.08}\text{O}_4$ | $\text{Cu}_{0.96}\text{Co}_{2.08}\text{O}_4$ |
| Zn-Co  | 0.46 | 0.62 | $\text{Zn}_{0.92}\text{Co}_{2.08}\text{O}_4$ | $\text{Zn}_{1.24}\text{Co}_{1.76}\text{O}_4$ |

#### D) The Rietveld refinement of the XRD patterns

The results of Rietveld refinement were obtained for the series of synthesized materials. Chemical composition revealed by XPS measurements was applied as the initial information for phase composition optimization. The quality of the Rietveld fit was checked by the reliability coefficients  $R$ , which should be less than 10%. and by the fit coefficient  $\chi^2$ , which should be close to one<sup>1</sup>. The final Rietveld fit resulted in  $R_p$  of 0.6-1.19,  $R_B$  ranging from 7.3-21.8,  $R_F$  ranging from 6.78 to 15.7, and  $\chi^2$  ranging from 1.3 to 2.7. Similar high values of  $R$ -factors for nanocrystalline materials were observed by other authors<sup>2,3</sup>. The reason may be due to the relatively large background noise in the XRD patterns of nanocrystalline materials, which was noticed especially for Fe-Co, Cu-Co, and Mn-Co. Meanwhile low  $\chi^2$  values were observed justifying the fit. The increased  $R_B$  values were related to the size of the nanocrystals. In the diffraction patterns, diffusive scattering becomes significant due to the large ratio of surface atoms to volume atoms. At the same time the Bragg scattering is reduced, due to decrease in the crystallinity, leading to large  $R$  factors<sup>4</sup>.

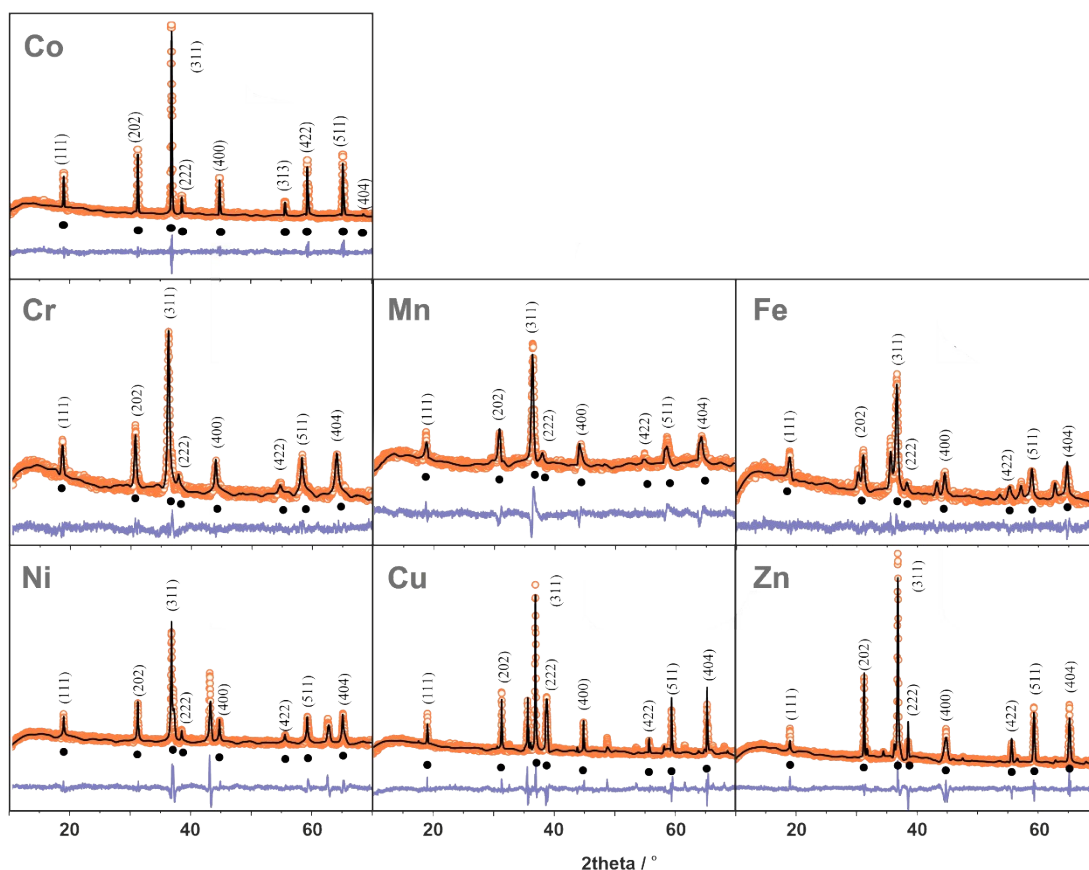

**Figure S3.** The experimentally obtained XRD patterns (orange dots) along with the fitted Rietveld model (black line) and disparity of data (purple line below). Marked peak positions corresponds to the  $(M_xCo_{1-x})[Co_{2-y}M_y]O_4$  phase.

**Table S3.** Rietveld refinement parameters, lattice parameter and volume of the unit cell of Co and M-Co spinels.

| Catalysts                      | $R_P$ [%] | $R_B$ [%] | $R_F$ [%] | $\chi^2$ | $V$ [Å <sup>3</sup> ] |
|--------------------------------|-----------|-----------|-----------|----------|-----------------------|
| Cr-Co                          | 1.06      | 10.2      | 15.4      | 1.8      | 578.97                |
| Mn-Co                          | 1.08      | 16.8      | 13.3      | 1.6      | 562.39                |
| Fe-Co                          | 0.76      | 21.8      | 11.7      | 1.3      | 540.07                |
| Co <sub>3</sub> O <sub>4</sub> | 0.60      | 7.3       | 8.4       | 1.8      | 528.92                |
| Ni-Co                          | 1.19      | 8.1       | 6.9       | 2.7      | 530.69                |
| Cu-Co                          | 0.61      | 14.5      | 15.2      | 2.7      | 529.22                |
| Zn-Co                          | 0.78      | 12.0      | 10.4      | 1.7      | 530.81                |

$R_P$  – profile factor.  $R_B$  – Bragg factor.  $R_F$  – crystallographic factor.  $\chi^2$  – goodness of fit factor.  $V$  – unit cell volume

### E) The temperature-programmed H<sub>2</sub> reduction

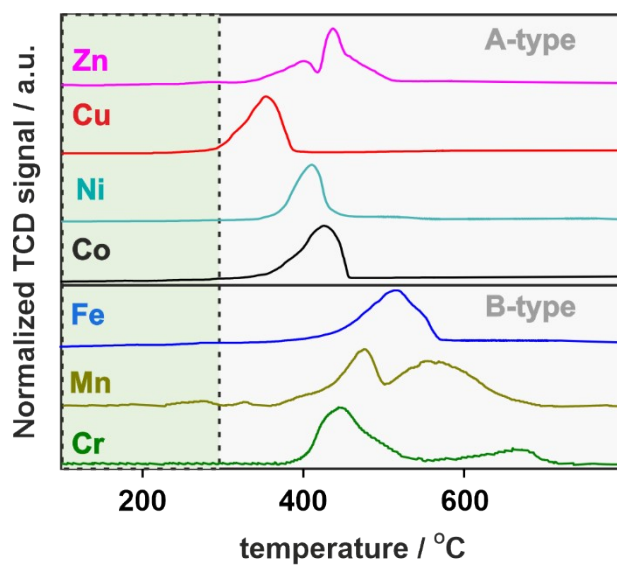

**Figure S4.** Temperature-programmed H<sub>2</sub>-reduction Green area corresponds to the PROX temperature window.

### F) Parity plots for CO and H<sub>2</sub> oxidation alone and in the CO-PROX reaction

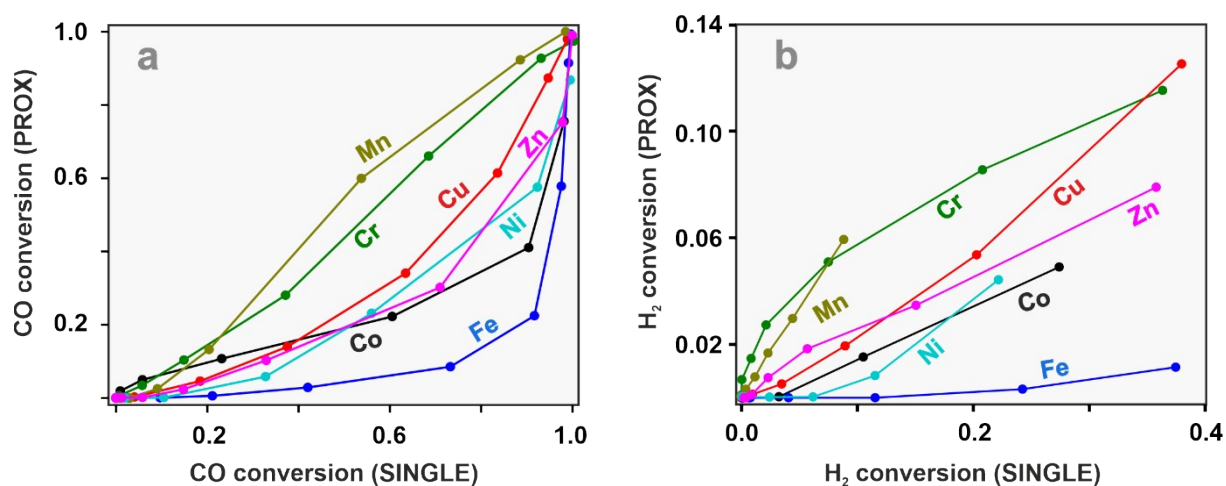

**Fig. S5.** Parity plots sole CO oxidation vs CO oxidation in PROX conditions (a) sole H<sub>2</sub> oxidation vs H<sub>2</sub> oxidation in PROX conditions (b).

### G) Reproducibility of PROX reaction

To evaluate the catalytic stability four consecutive PROX runs (with after going cooling in the inert gas flow) on the reference  $\text{Co}_3\text{O}_4$  spinel were conducted, and the results are shown on the **Figure S6**.

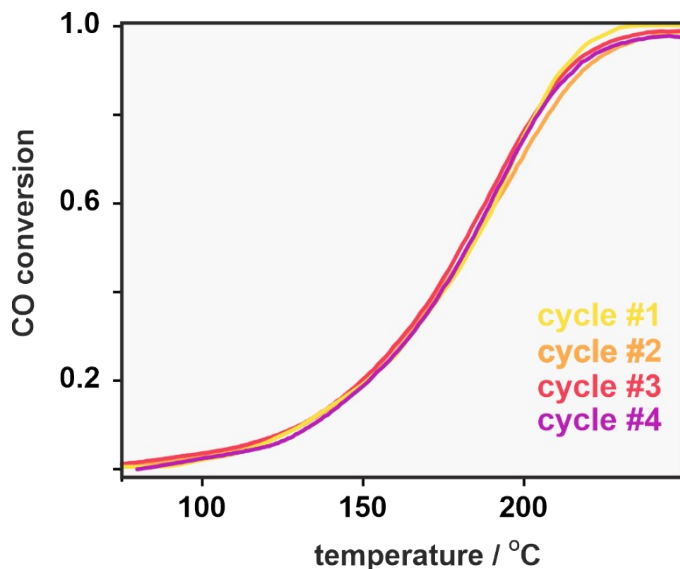

**Figure S6.** The reproducibility of CO conversion over  $\text{Co}_3\text{O}_4$ , measured within four consecutive cycles of PROX process.

### H) Assessment of the CO methanation

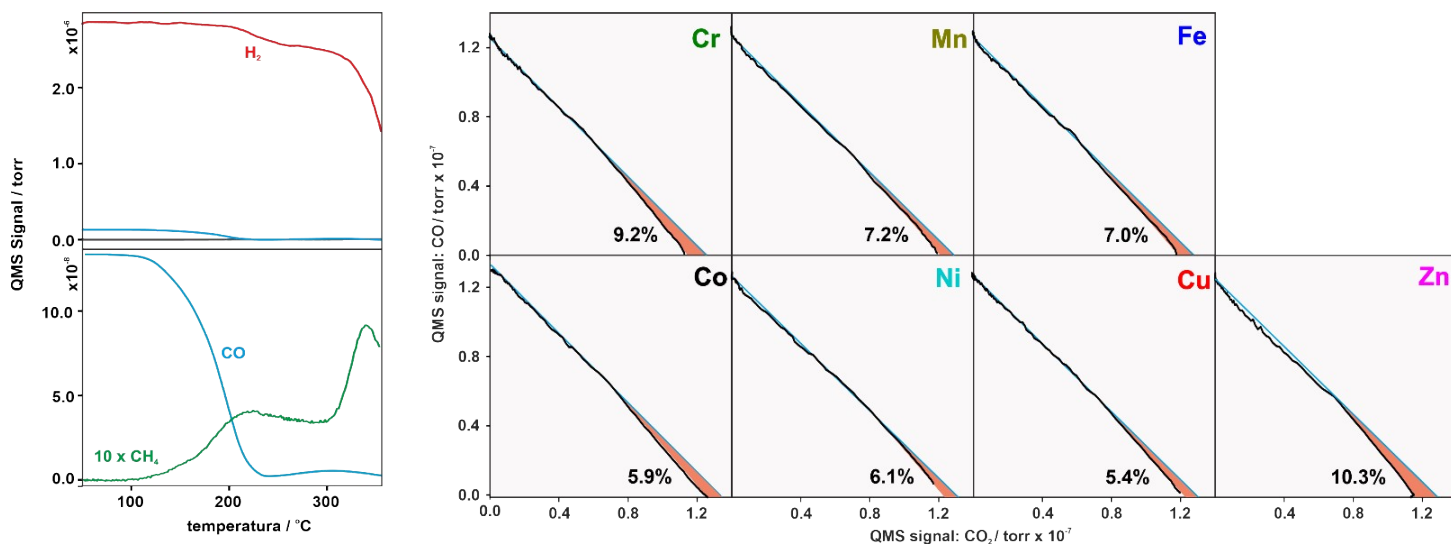

**Figure S7.** Formation of  $\text{CH}_4$  during the CO-PROX reaction over  $\text{Co}_3\text{O}_4$  catalyst. QMS profiles of (left) and the CO vs  $\text{CO}_2$  parity (right) showing the divergence in the high temperature region associated with the  $\text{CH}_4$  formation.

## I) Metal 3d and oxygen 2p band centers and Pauling electronegativities

**Table S4.** The positions of the metal and oxygen band centers, calculated by Sun et. al<sup>5</sup> along with the Pauling electronegativities.

| Mixed spinel formula                                                                               | Oxygen 2p band center<br>$E_{O2p}/\text{eV}$ | Metal 3d band center (max<br>{ $M_{A-3d}$ , $M_{B-3d}$ } ) $E_{Md3}/\text{eV}$ | Pauling<br>electronegativity |
|----------------------------------------------------------------------------------------------------|----------------------------------------------|--------------------------------------------------------------------------------|------------------------------|
| Co[Cr <sub>1.75</sub> Co <sub>0.25</sub> ]O <sub>4</sub>                                           | -2.503                                       | -1.769                                                                         | 1.7                          |
| [Mn <sub>0.125</sub> Co <sub>0.875</sub> ][Mn <sub>0.875</sub> Co <sub>1.125</sub> ]O <sub>4</sub> | -2.573                                       | -1.292                                                                         | 1.6                          |
| [Fe <sub>0.5</sub> Co <sub>0.5</sub> ][Fe <sub>0.5</sub> Co <sub>1.5</sub> ]O <sub>4</sub>         | -3.416                                       | -2.091                                                                         | 1.8                          |
| CoCo <sub>2</sub> O <sub>4</sub>                                                                   | -2.336                                       | -1.204                                                                         | 1.9                          |
| [Ni <sub>0.5</sub> Co <sub>0.5</sub> ][Ni <sub>0.5</sub> Co <sub>1.5</sub> ]O <sub>4</sub>         | -2.176                                       | -1.538                                                                         | 1.9                          |
| Co[Cu <sub>0.25</sub> Co <sub>1.75</sub> ]O <sub>4</sub>                                           | -1.525                                       | -1.220                                                                         | 1.9                          |
| [Zn <sub>0.875</sub> Co <sub>0.125</sub> ]Co <sub>2</sub> O <sub>4</sub>                           | -1.338                                       | -0.638                                                                         | 1.7                          |

### Biography

- 1 D. Kaczorowski, E. Murashova, Z. Kurenbaeva and A. Griбанov, *J. Alloys Compd.*, 2019, **802**, 437–444.
- 2 B. Mandal, M. R. Das and P. Mitra, *J. Alloys Compd.*, 2019, **784**, 877–886.
- 3 G. R. Reddy, G. R. Dillip, T. V. M. Sreekanth, R. Rajavaram, B. D. P. Raju, P. C. Nagajyothi and J. Shim, *Appl. Surf. Sci.*, 2020, **529**, 147123.
- 4 A. Kumar, Understanding Complex Ordering In Transition Metal Oxides, *Doctoral Thesis*, West Bengal University of Technology, 2013.
- 5 Y. Sun, H. Liao, J. Wang, B. Chen, S. Sun, S. J. H. Ong, S. Xi, C. Diao, Y. Du, J. O. Wang, M. B. H. Breese, S. Li, H. Zhang and Z. J. Xu, *Nat. Catal.*, 2020, **3**, 554–563.
